# Supplementary material
Source: PubMed Central journal article supplement (PMC6108912)
Supplement: NIHMS953180-supplement-Supp_info.pdf [file NIHMS953180-supplement-Supp_info.pdf]

## Supplemental Material

### **Risk of basal cell carcinoma in a randomized clinical trial of aspirin and folic acid for the prevention of colorectal adenomas**

M. N. Passarelli<sup>1</sup>, E. L. Barry<sup>1</sup>, D. Zhang<sup>2</sup>, P. Gangar<sup>3</sup>, J.R. Rees<sup>1</sup>, R. S. Bresalier<sup>4</sup>, G. McKeown-Eyssen<sup>5</sup>, M. R. Karagas,<sup>1</sup> J. A. Baron<sup>1,2</sup>

<sup>1</sup>Department of Epidemiology, Geisel School of Medicine at Dartmouth, Hanover, NH, U.S.A.

<sup>2</sup>Department of Epidemiology, University of North Carolina, Chapel Hill, NC, U.S.A.

<sup>3</sup>Department of Pediatrics, University of Arizona, Tucson, AZ, U.S.A.

<sup>4</sup>Department of Gastroenterology, Hepatology, and Nutrition, University of Texas MD Anderson Cancer Center, Houston, TX, U.S.A.

<sup>5</sup>Dalla Lana School of Public Health, University of Toronto, ON, Canada.

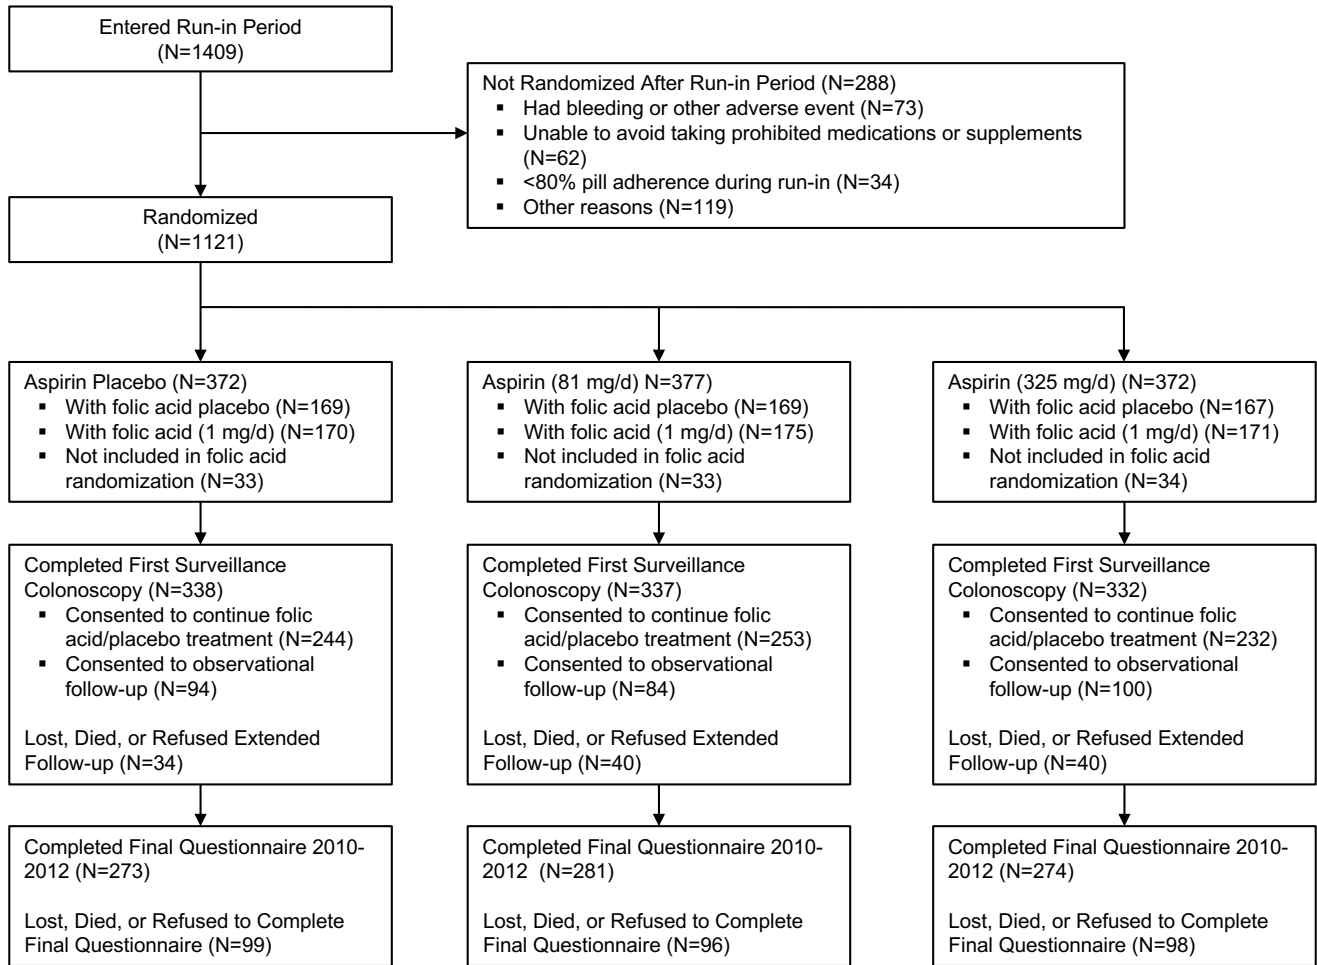

**Supplemental Fig 1.** Flow of participants in aspirin/placebo arms of the Aspirin/Folate Polyp Prevention Study. Exclusions for skin cancer analysis based on race/ethnicity not shown.

**Supplemental Table 1** Counts of non-Hispanic white participants diagnosed with basal cell carcinoma and/or cutaneous squamous cell carcinoma during the Aspirin/Folate Polyp Prevention Study. Only lesions identified at the time of first diagnosis after randomization shown.

| <b>Anatomic location</b> | <b>BCC Only<br/>(N=102)</b> | <b>SCC Only<br/>(N=29)</b> | <b>BCC &amp; SCC<br/>(N=2)</b> |
|--------------------------|-----------------------------|----------------------------|--------------------------------|
| 1 lesion                 |                             |                            |                                |
| Head/neck                | 61                          | 12                         | —                              |
| Torso                    | 22                          | 2                          | —                              |
| Lower limbs              | 2                           | 5                          | —                              |
| Upper limbs              | 4                           | 8                          | —                              |
| Missing                  | 1                           | 0                          | —                              |
| >1 lesion                |                             |                            |                                |
| All head/neck            | 3                           | 2                          | 1                              |
| All torso                | 4                           | 0                          | 1                              |
| All lower limbs          | 0                           | 0                          | 0                              |
| All upper limbs          | 0                           | 0                          | 0                              |
| Head/neck & torso        | 2                           | 0                          | 0                              |
| Torso & upper limbs      | 3                           | 0                          | 0                              |

Abbreviations: BCC, basal cell carcinoma; SCC, squamous cell carcinoma.

**Supplemental Table 2** Hazard ratios of cutaneous squamous cell carcinoma (SCC) for aspirin and folic acid treatment assignment.

| Treatment Assignment            | SCC Events/At         |                          |      |
|---------------------------------|-----------------------|--------------------------|------|
|                                 | Risk <sup>a</sup> (%) | HR <sup>a</sup> (95% CI) | P    |
| Aspirin Placebo                 | 8/307 (3)             | 1 (Reference)            |      |
| Aspirin 81 mg/d                 | 11/329 (3)            | 1.31 (0.52, 3.25)        | 0.57 |
| Aspirin 325 mg/d                | 12/322 (4)            | 1.38 (0.56, 3.38)        | 0.48 |
| Folic Acid Placebo <sup>b</sup> | 11/431 (3)            | 1 (Reference)            |      |
| Folic Acid 1 mg/d               | 19/443 (4)            | 1.65 (0.78, 3.46)        | 0.19 |

Abbreviations: CI, confidence interval; HR, hazard ratio; SCC, squamous cell carcinoma; UV, ultraviolet radiation.

<sup>a</sup> HR adjusted for age at randomization (<60 vs ≥60 years), sex (male vs female), study center (high vs low UV).

<sup>b</sup> Excludes 84 participants randomized to aspirin/placebo only, of whom 1 was diagnosed with SCC over follow-up.

**Supplemental Table 3** Self-reported use of non-protocol aspirin and NSAIDs according to study year.

| <b>Average use after randomization</b>  | <b>Placebo<br/>Users/At risk* (%)</b> | <b>Aspirin 81 mg/d<br/>Users/At risk* (%)</b> | <b>Aspirin 325 mg/d<br/>Users/At risk* (%)</b> |
|-----------------------------------------|---------------------------------------|-----------------------------------------------|------------------------------------------------|
| Year preceding end of study treatment   |                                       |                                               |                                                |
| Aspirin                                 |                                       |                                               |                                                |
| >4 days/month                           | 8/289 (3)                             | 14/309 (5)                                    | 18/310 (6)                                     |
| >4 days/week                            | 3/289 (1)                             | 12/309 (4)                                    | 7/310 (2)                                      |
| Non-aspirin NSAIDs                      |                                       |                                               |                                                |
| >4 days/month                           | 7/289 (2)                             | 8/309 (3)                                     | 7/310 (2)                                      |
| >4 days/week                            | 1/289 (<1)                            | 1/309(<1)                                     | 1/310 (<1)                                     |
| Year 2 following end of study treatment |                                       |                                               |                                                |
| Aspirin                                 |                                       |                                               |                                                |
| >4 days/month                           | 62/283 (22)                           | 66/288 (23)                                   | 72/291 (25)                                    |
| >4 days/week                            | 36/283 (13)                           | 48/288 (17)                                   | 39/291 (13)                                    |
| Non-aspirin NSAIDs                      |                                       |                                               |                                                |
| >4 days/month                           | 24/283 (8)                            | 30/288 (10)                                   | 28/291 (10)                                    |
| >4 days/week                            | 9/283 (3)                             | 11/288 (4)                                    | 8/291 (3)                                      |
| Year 5 following end of study treatment |                                       |                                               |                                                |
| Aspirin                                 |                                       |                                               |                                                |
| >4 days/month                           | 76/257 (30)                           | 82/261 (31)                                   | 79/262 (30)                                    |
| >4 days/week                            | 51/257 (20)                           | 56/261 (21)                                   | 56/262 (21)                                    |
| Non-aspirin NSAIDs                      |                                       |                                               |                                                |
| >4 days/month                           | 23/257 (9)                            | 28/261 (11)                                   | 17/262 (6)                                     |
| >4 days/week                            | 11/257 (4)                            | 13/261 (5)                                    | 7/262 (3)                                      |

Abbreviations: BCC, basal cell carcinoma; NSAID, nonsteroidal anti-inflammatory drug.

<sup>a</sup> Participants lost to follow-up or no longer at risk for first BCC before the end of the given year are excluded. Restricted to non-Hispanic white participants.
